# Supplementary material for: Wearable superhigh energy density supercapacitors using a hierarchical ternary metal selenide composite of CoNiSe2 microspheres decorated with CoFe2Se4 nanorods
Source: Royal Society of Chemistry journal article supplement (doi:10.1039/c8ta01141a), 2018-01-01
Supplement: c8ta01141a1.pdf [file c8ta01141a1.pdf]

# Wearable superhigh energy density supercapacitors using hierarchical ternary metal selenides composite of $\text{CoNiSe}_2$ microspheres decorated with $\text{CoFe}_2\text{Se}_4$ nanorods

*Chandu V. V. Muralee Gopi, Araveeti Eswar Reddy, Hee-Je Kim\**

School of Electrical and Computer Engineering, Pusan National University, Busandaehak-ro  
63 beon-gil, Geumjeong-gu, Busan, 46241, South Korea.

**\*Corresponding Author**

Hee-Je Kim: e-mail: [heeje@pusan.ac.kr](mailto:heeje@pusan.ac.kr); Tel: +82 51 510 2364. Fax: +82 51 513 0212.

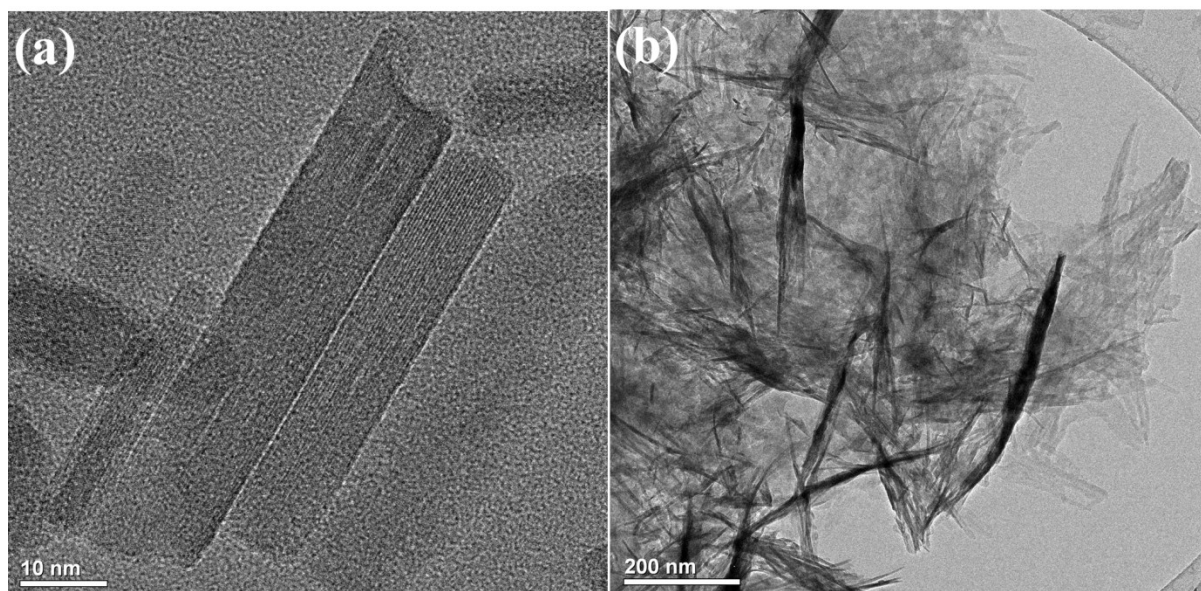

**Figure S1** TEM images of CFS and CNS materials.

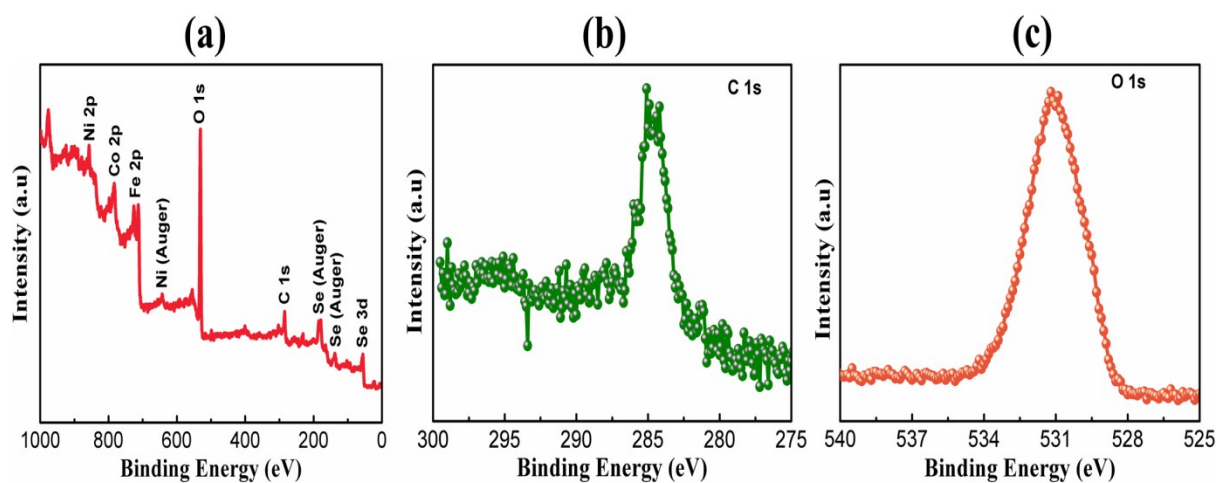

**Figure S2.** XPS survey scan spectrum of the (a) CFS-CNS and high-resolution XPS plots of (b) C 1s and (c) O 1s.

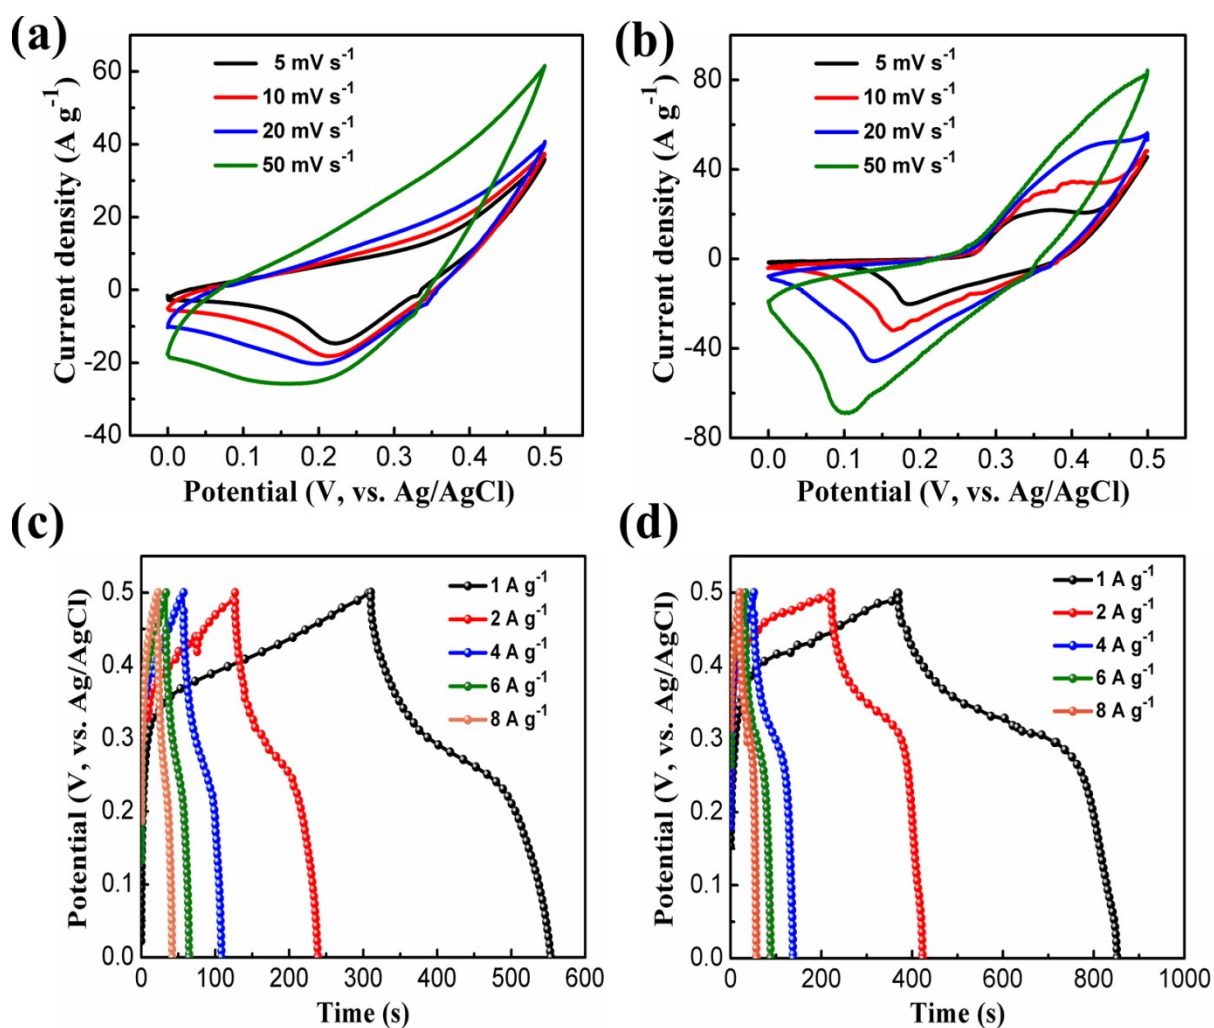

**Figure S3** Electrochemical performance of the samples. (a) CV curves of the CFS and (b) CNS. Galvanostatic charge/discharge curves of (c) CFS and (d) CNS at different current densities from 1–8  $\text{A g}^{-1}$ .

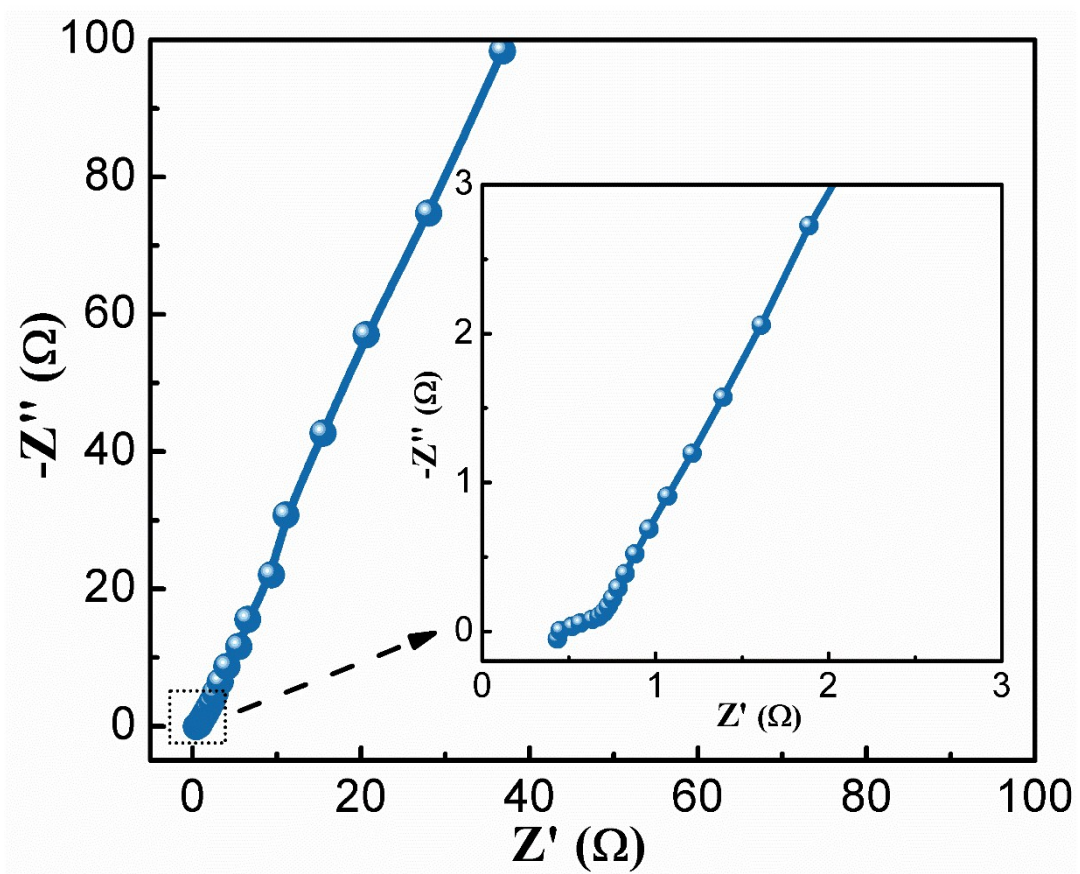

**Figure S4** EIS plot of the assembled CFS-CNS//CFS-CNS symmetric SC.

**Table S1.** Comparative electrochemical performance of CFS-CNS//CFS-CNS symmetric device with previously reported SCs.

| Symmetric or Asymmetric device                                                                                                              | Cycling stability of devices | Energy densities of devices                          | Reference                                             |
|---------------------------------------------------------------------------------------------------------------------------------------------|------------------------------|------------------------------------------------------|-------------------------------------------------------|
| Ni <sub>3</sub> Se <sub>2</sub> //AC                                                                                                        | 98% after 5000 cycles        | 32.8 Wh kg <sup>-1</sup> at 677 W kg <sup>-1</sup>   | <b>[Ref. 14]</b><br><i>Adv. Energy Mater.</i>         |
| CoNi <sub>2</sub> S <sub>4</sub> -G-MoSe <sub>2</sub> //<br>CoNi <sub>2</sub> S <sub>4</sub> -G-MoSe <sub>2</sub>                           | 108% after 2000 cycles       | 38.6 Wh kg <sup>-1</sup> at 885.6 W kg <sup>-1</sup> | <b>[Ref. 16]</b><br><i>Adv. Energy Mater.</i>         |
| FeCo <sub>2</sub> S <sub>4</sub> -NiCo <sub>2</sub> S <sub>4</sub> //<br>FeCo <sub>2</sub> S <sub>4</sub> -NiCo <sub>2</sub> S <sub>4</sub> | 92% after 3000 cycles        | 45.8 Wh kg <sup>-1</sup> at 1070 W kg <sup>-1</sup>  | <b>[Ref. 21]</b><br><i>Adv. Energy Mater.</i>         |
| ZCS/Ni(OH) <sub>2</sub> //ZCS/<br>Ni(OH) <sub>2</sub>                                                                                       | 78% after 10000 cycles       | 74.93 Wh kg <sup>-1</sup> at 650 W Kg <sup>-1</sup>  | <b>[Ref. 35]</b><br><i>Adv. Energy Mater.</i>         |
| GrMnO <sub>2</sub> //GrMoO <sub>3</sub>                                                                                                     | --                           | 42.6 Wh kg <sup>-1</sup> at 276 W kg <sup>-1</sup>   | <b>[Ref. 39]</b><br><i>Adv. Funct. Mater.</i>         |
| NiSe@MoSe <sub>2</sub> //N-<br>PMCN                                                                                                         | 91.4% after 5000 cycles      | 32.6 Wh kg <sup>-1</sup> at 415 W kg <sup>-1</sup>   | <b>[Ref. 40]</b><br><i>ACS Sustainable Chem. Eng.</i> |
| Fe-SNC//Fe-SNC                                                                                                                              | 95% after 1000 cycles        | 14.4 Wh kg <sup>-1</sup> at 224.2 W kg <sup>-1</sup> | <b>[Ref. 41]</b><br><i>Adv. Energy Mater.</i>         |
| NiCo <sub>2</sub> S <sub>4</sub> -<br>NCF//OMC-NCF                                                                                          | ~90% after 3000 cycles       | 45.5 Wh kg <sup>-1</sup> at 512 W kg <sup>-1</sup>   | <b>[Ref. 42]</b><br><i>Adv. Energy Mater.</i>         |
| <b>CFS-CNS//CFS-CNS</b>                                                                                                                     | ~97% after 3000 cycles       | 80.2 W h kg <sup>-1</sup> at 1000 W kg <sup>-1</sup> | <b>This Work</b>                                      |



**(i) Normal**

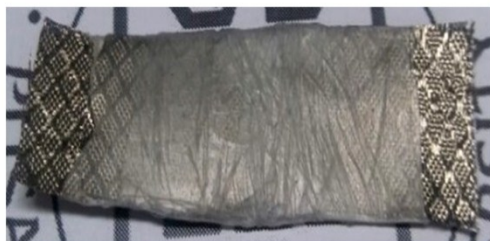

**(ii) Bended**

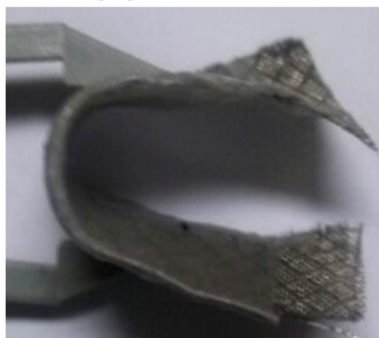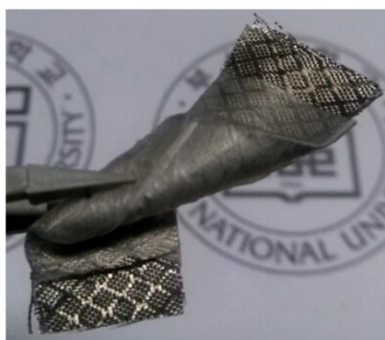

**(iii) Twisted**

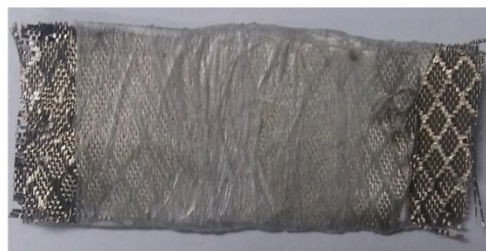

**(iv) Recovered**

**Figure S5** Photographs of symmetric supercapacitor at various bending conditions
